# Supplementary material for: Sphincter of Oddi laxity alters bile duct microbiota and contributes to the recurrence of choledocholithiasis
Source: PubMed Central journal article supplement — Ann Transl Med. 2020 Nov;8(21):1383. doi: 10.21037/atm-20-3295 (PMC7723656; doi:10.21037/atm-20-3295), 2020-11
Supplement: atm-08-21-1383-supplementary.pdf [file atm-08-21-1383-supplementary.pdf]

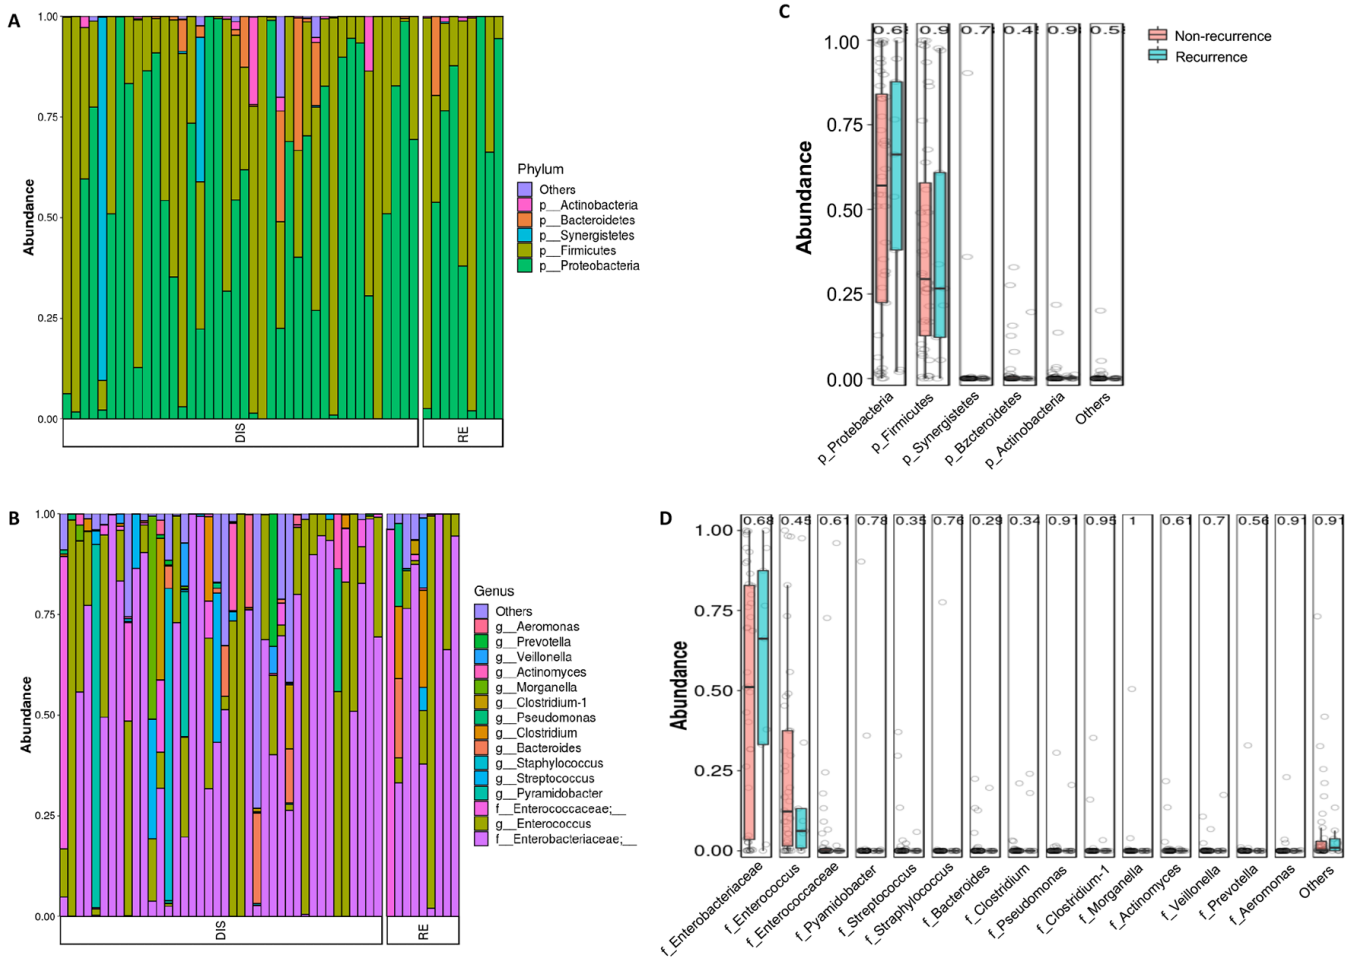

**Figure S1** Comparison of the bile microbiota in patients with and without cholangiolithiasis recurrence. (A,B) At the phylum level; (C,D) at the family level. P values are shown.

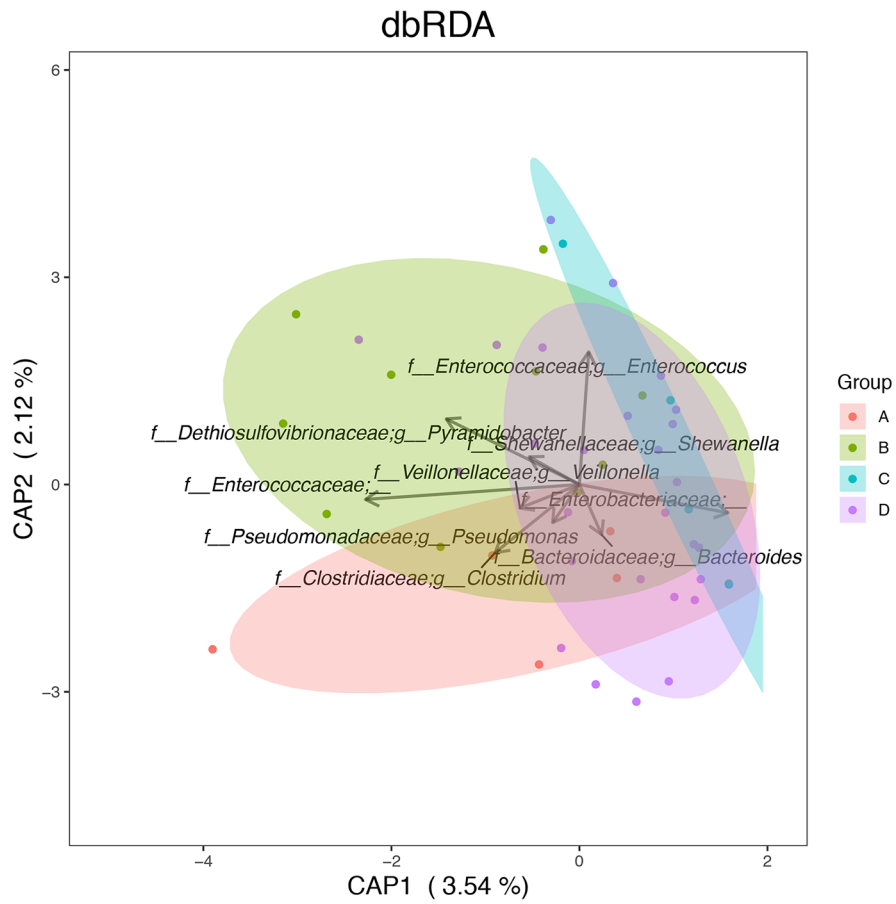

**Figure S2** Distance-based redundancy analysis (dbRDA) showing the similarity of different groups. (A) SOL/recurrence; (B) SOL/non-recurrence; (C) non-SOL/recurrence; (D) non-SOL/non-recurrence. SOL, sphincter of Oddi laxity.

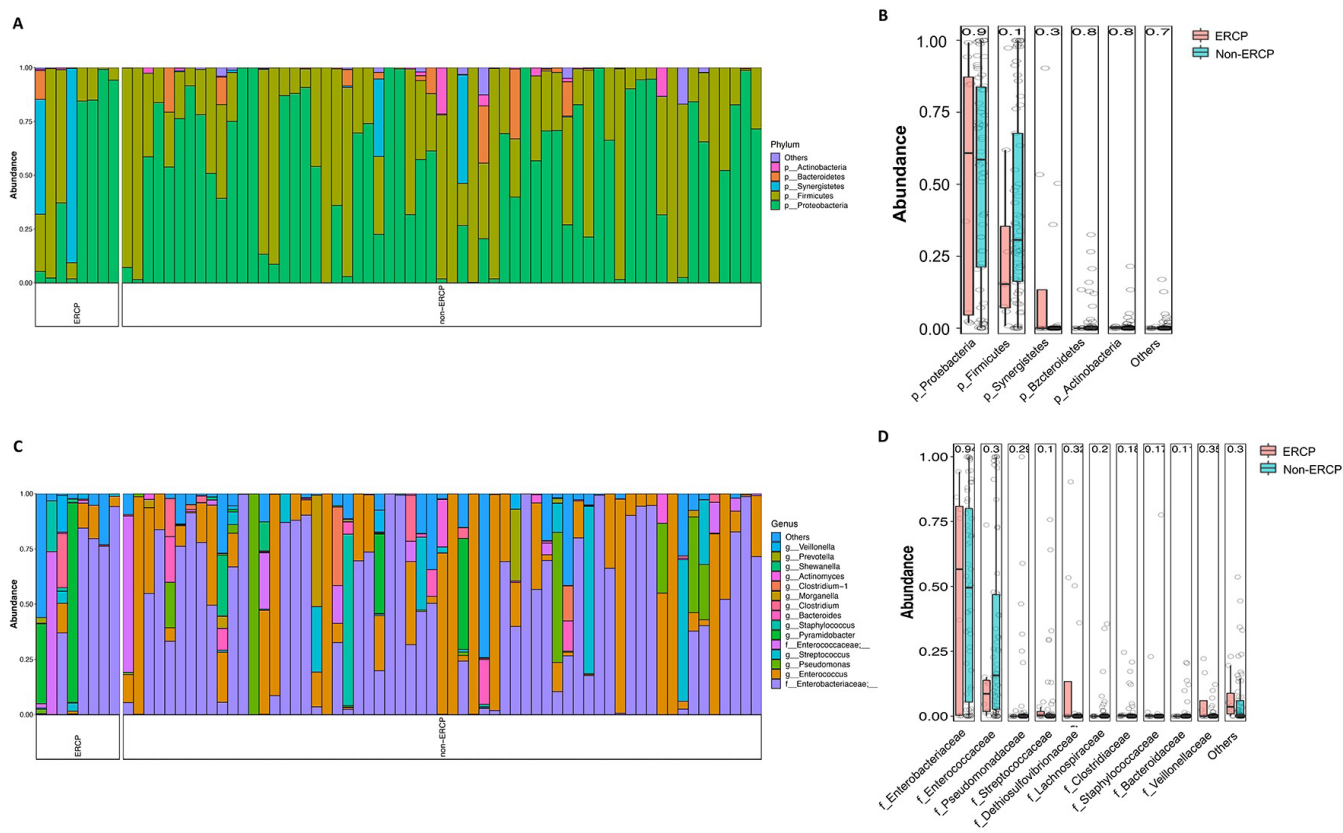

**Figure S3** Comparison of the bile microbiota in patients with and without previous sphincterotomy by ERCP. (A,B) At the phylum level; (C,D) at the family level. P values are shown. ERCP, endoscopic retrograde cholangiopancreatography.
